# Supplementary material for: Characterization of MicroRNAs and Gene Expression in ACC Oxidase RNA Interference-Based Transgenic Bananas
Source: MDPI journal article supplement (doi:10.3390/plants12193414), 2023-09-28
Supplement: s1 [file s1]

Table S11. Primer design for detection of miRNAs during banana fruit ripening

| miRNA Name    | Primer Sequence (5'-3') |
|---------------|-------------------------|
| miR156e-5p    | TGACAGAAGAGAGTGAGCAC    |
| miR164a-5p    | TATATGGAGAAGCAGGGCA     |
| miR169a       | TATATCAGCCAAGGATGACTTGC |
| miR171a       | TGATTGAGCCGTGCCAATATC   |
| miR319        | ACAATTGGACTGAAGGGAGCT   |
| U6 fwd primer | ATTGGAACGATACAGAGAAG    |
