# Supplementary material for: Characterization of MicroRNAs and Gene Expression in ACC Oxidase RNA Interference-Based Transgenic Bananas
Source: MDPI journal article supplement (doi:10.3390/plants12193414), 2023-09-28
Supplement: s1 [file s1]

Table S1. Length distribution of sRNAs in WT, *ACO1* and *ACO2* silenced transgenic banana plants.

| length (nt) \ Sample | WT     |            | As1    |            | As2   |            |
|----------------------|--------|------------|--------|------------|-------|------------|
|                      | reads  | percentage | reads  | percentage | reads | percentage |
| Unique sRNA          |        |            |        |            |       |            |
| 18                   | 2105   | 0.011594   | 3356   | 0.012385   | 2100  | 0.033999   |
| 19                   | 2928   | 0.016127   | 2012   | 0.007425   | 1214  | 0.019655   |
| 20                   | 18064  | 0.099491   | 47504  | 0.175303   | 12297 | 0.199087   |
| 21                   | 140738 | 0.775143   | 200216 | 0.738854   | 40854 | 0.661421   |
| 22                   | 17729  | 0.097646   | 17894  | 0.066034   | 5302  | 0.085839   |
| Known-miRNA          |        |            |        |            |       |            |
| 18                   | 1825   | 0.015025   | 3216   | 0.014133   | 1894  | 0.045263   |
| 19                   | 2020   | 0.016631   | 1430   | 0.006284   | 869   | 0.020768   |
| 20                   | 16309  | 0.134271   | 44561  | 0.195828   | 10607 | 0.253489   |
| 21                   | 98695  | 0.812552   | 170604 | 0.749736   | 26631 | 0.636435   |
| 22                   | 2614   | 0.021521   | 7741   | 0.034019   | 1843  | 0.044045   |
| Novel-miRNA          |        |            |        |            |       |            |
| 18                   | 280    | 0.004659   | 140    | 0.003224   | 206   | 0.010340   |
| 19                   | 908    | 0.015108   | 582    | 0.013401   | 345   | 0.017317   |
| 20                   | 1755   | 0.029201   | 2943   | 0.067764   | 1690  | 0.084827   |
| 21                   | 42043  | 0.699539   | 29612  | 0.681833   | 14223 | 0.713899   |
| 22                   | 15115  | 0.251493   | 10153  | 0.233778   | 3459  | 0.173618   |
