# Supplementary material for: Characterization of MicroRNAs and Gene Expression in ACC Oxidase RNA Interference-Based Transgenic Bananas
Source: MDPI journal article supplement (doi:10.3390/plants12193414), 2023-09-28
Supplement: s1 [file s1]

Table S9. Statistics of miRNA expression in different tissues of banana based on <https://www.pmiren.com>.

| mature_miRNA_ID | Flower   | Fruit    | Leaf     | Leaf and Root |
|-----------------|----------|----------|----------|---------------|
| Mac-MIR156a     | 3068.594 | 4584.687 | 12674.15 | 3.635103      |
| Mac-MIR156b     | 1147.873 | 1143.919 | 4819.938 | 1.801773      |
| Mac-MIR156c     | 3068.594 | 4584.687 | 12674.15 | 3.635103      |
| Mac-MIR156d     | 3068.594 | 4584.687 | 12674.15 | 3.635103      |
| Mac-MIR156e     | 3036.023 | 4404.834 | 12318.11 | 3.436156      |
| Mac-MIR156f     | 3036.023 | 4420.775 | 12308.92 | 4.735211      |
| Mac-MIR156g     | 3036.023 | 4404.834 | 12318.11 | 3.436156      |
| Mac-MIR156h     | 3068.594 | 4584.341 | 12673.94 | 3.635103      |
| Mac-MIR156i     | 3031.37  | 4401.023 | 12254.71 | 3.331332      |
| Mac-MIR156j     | 3031.37  | 4401.023 | 12254.71 | 3.331332      |
| Mac-MIR156k     | 3068.594 | 4584.687 | 12674.15 | 3.635103      |
| Mac-MIR156l     | 3068.594 | 4584.341 | 12673.94 | 3.635103      |
| Mac-MIR156m     | 1112.045 | 962.6804 | 4435.61  | 1.801773      |
| Mac-MIR156n     | 3036.023 | 4404.834 | 12318.11 | 3.436156      |
| Mac-MIR156o     | 75.37713 | 304.6062 | 170.6103 | 0.230504      |
| Mac-MIR156p     | 3068.594 | 4584.687 | 12674.15 | 3.635103      |
| Mac-MIR156q     | 3036.023 | 4404.834 | 12318.11 | 3.436156      |
| Mac-MIR156r     | 1147.873 | 1143.919 | 4819.938 | 1.801773      |
| Mac-MIR156s     | 27.45216 | 37.77256 | 543.4625 | 0.125679      |
| Mac-MIR156t     | 3068.594 | 4584.687 | 12674.15 | 3.635103      |
| Mac-MIR156u     | 1147.873 | 1143.919 | 4819.938 | 1.801773      |
| Mac-MIR156v     | 3068.594 | 4584.687 | 12674.15 | 3.635103      |
| Mac-MIR156w     | 27.45216 | 37.77256 | 543.4625 | 0.125679      |
| Mac-MIR156x     | 80.49533 | 334.4084 | 178.472  | 0.052412      |
| Mac-MIR156y     | 3031.37  | 4401.023 | 12254.71 | 3.331332      |
| Mac-MIR156z     | 3036.023 | 4404.834 | 12318.11 | 3.436156      |
| Mac-MIR159a     | 67.93248 | 71.38667 | 3977.793 | 61.67445      |
| Mac-MIR159b     | 67.93248 | 71.38667 | 3977.793 | 61.67445      |
| Mac-MIR159c     | 0.930582 | 2.079223 | 802.0256 | 19.48362      |
| Mac-MIR159d     | 67.93248 | 71.38667 | 3977.793 | 61.67445      |
| Mac-MIR159e     | 67.46718 | 71.38667 | 3945.542 | 95.17003      |
| Mac-MIR159f     | 0.930582 | 2.079223 | 802.0256 | 19.48362      |
| Mac-MIR162a     | 11.63227 | 9.703042 | 79.39467 | 2.367606      |
| Mac-MIR162b     | 116.3227 | 162.8725 | 2427.322 | 70.31942      |
| Mac-MIR162c     | 117.2533 | 163.5656 | 2427.256 | 70.31942      |
| Mac-MIR162d     | 120.9756 | 168.7636 | 2442.248 | 70.62319      |

Table S9 (cont.)

| mature_miRNA_ID | Flower   | Fruit    | Leaf     | Leaf and Root |
|-----------------|----------|----------|----------|---------------|
| Mac-MIR162e     | 120.9756 | 168.7636 | 2442.248 | 70.62319      |
| Mac-MIR162f     | 120.9756 | 168.7636 | 2442.248 | 70.62319      |
| Mac-MIR162g     | 116.3227 | 163.219  | 2425.894 | 70.26701      |
| Mac-MIR164c     | 24.19513 | 14.20803 | 46.69707 | 0.052412      |
| Mac-MIR164d     | 182.394  | 59.6044  | 191.9006 | 0.670658      |
| Mac-MIR164e     | 187.047  | 61.33709 | 192.5232 | 0.314474      |
| Mac-MIR164f     | 187.047  | 61.33709 | 192.5232 | 0.314474      |
| Mac-MIR164g     | 59.09195 | 0.693074 | 272.0048 | 0.314474      |
| Mac-MIR164h     | 182.394  | 59.95094 | 194.1666 | 0.314474      |
| Mac-MIR164i     | 182.394  | 59.6044  | 191.9006 | 0.670658      |
| Mac-MIR164j     | 0.465291 | 0.346537 | 2.905605 | 0             |
| Mac-MIR164k     | 187.047  | 61.33709 | 192.5232 | 0.314474      |
| Mac-MIR164l     | 182.394  | 59.6044  | 191.9006 | 0.670658      |
| Mac-MIR166a     | 797.0434 | 602.9747 | 6568.748 | 2.870874      |
| Mac-MIR166b     | 796.5781 | 602.6282 | 6563.411 | 3.876861      |
| Mac-MIR166c     | 797.0434 | 602.6282 | 6568.583 | 2.870874      |
| Mac-MIR166d     | 797.0434 | 602.9747 | 6568.748 | 2.870874      |
| Mac-MIR166e     | 6049.247 | 7922.187 | 51008.96 | 44.95547      |
| Mac-MIR166f     | 150.289  | 177.4271 | 4401.395 | 1.655238      |
| Mac-MIR166g     | 5918.501 | 7882.335 | 47238.82 | 40.03036      |
| Mac-MIR166h     | 151.2196 | 177.4271 | 4411.014 | 1.602826      |
| Mac-MIR166i     | 5914.313 | 7762.78  | 46638.26 | 107.9641      |
| Mac-MIR166j     | 133.5385 | 41.58447 | 3799.402 | 1.141818      |
| Mac-MIR166k     | 5918.501 | 7882.335 | 47238.82 | 40.03036      |
| Mac-MIR166l     | 151.2196 | 177.4271 | 4411.014 | 1.602826      |
| Mac-MIR166m     | 151.2196 | 177.4271 | 4411.014 | 1.602826      |
| Mac-MIR166n     | 151.2196 | 177.4271 | 4411.014 | 1.602826      |
| Mac-MIR166o     | 151.2196 | 177.4271 | 4411.014 | 1.602826      |
| Mac-MIR166p     | 151.2196 | 177.4271 | 4411.014 | 1.602826      |
| Mac-MIR166q     | 151.2196 | 177.4271 | 4411.014 | 1.602826      |
| Mac-MIR166r     | 151.2196 | 177.4271 | 4411.014 | 1.602826      |
| Mac-MIR166s     | 5914.313 | 7762.78  | 46638.26 | 107.9641      |
| Mac-MIR166t     | 5912.917 | 7761.047 | 46634.15 | 107.0003      |
| Mac-MIR166u     | 151.2196 | 177.4271 | 4411.014 | 1.602826      |
| Mac-MIR168a     | 402.9419 | 1735.805 | 1923.396 | 4.034649      |
| Mac-MIR168b     | 403.8725 | 1756.251 | 1961.345 | 11.90445      |
| Mac-MIR168c     | 407.5949 | 1762.488 | 1990.579 | 12.31304      |
| Mac-MIR168d     | 403.8725 | 1756.251 | 1961.345 | 11.90445      |
| Mac-MIR168e     | 403.8725 | 1756.251 | 1961.345 | 11.90445      |

Table S9 (cont.)

| mature_miRNA_ID | Flower   | Fruit    | Leaf     | Leaf and Root |
|-----------------|----------|----------|----------|---------------|
| Mac-MIR168h     | 403.8725 | 1756.251 | 1961.345 | 11.90445      |
| Mac-MIR168f     | 402.9419 | 1735.805 | 1923.396 | 4.034649      |
| Mac-MIR168g     | 403.8725 | 1756.251 | 1961.345 | 11.90445      |
| Mac-MIR168i     | 403.8725 | 1756.251 | 1961.345 | 11.90445      |
| Mac-MIR168j     | 0        | 1.039612 | 0.830091 | 0             |
| Mac-MIR169a     | 0.930582 | 0.693074 | 2.050213 | 0             |
| Mac-MIR169b     | 52.11258 | 38.46563 | 3.94324  | 0             |
| Mac-MIR169c     | 51.182   | 37.77256 | 3.94324  | 0             |
| Mac-MIR169d     | 51.64729 | 38.11909 | 3.94324  | 0             |
| Mac-MIR169e     | 52.11258 | 38.46563 | 3.94324  | 0             |
| Mac-MIR169f     | 14.42402 | 2.079223 | 2.166717 | 0.125679      |
| Mac-MIR169g     | 52.11258 | 38.46563 | 3.94324  | 0             |
| Mac-MIR169h     | 9.305819 | 1.386149 | 4.00955  | 0             |
| Mac-MIR169i     | 13.95873 | 1.732686 | 2.166717 | 0.125679      |
| Mac-MIR169j     | 52.11258 | 38.46563 | 3.94324  | 0             |
| Mac-MIR169k     | 9.305819 | 1.732686 | 4.00955  | 0             |
| Mac-MIR169l     | 0.930582 | 0.693074 | 1.817859 | 0             |
| Mac-MIR169m     | 1.861164 | 2.079223 | 0.415086 | 0             |
| Mac-MIR169n     | 1.395873 | 1.386149 | 2.921885 | 0             |
| Mac-MIR169o     | 1.395873 | 0.693074 | 7.029831 | 0             |
| Mac-MIR169p     | 1.395873 | 0.693074 | 7.029831 | 0             |
| Mac-MIR169q     | 1.861164 | 1.039612 | 7.926314 | 0.125679      |
| Mac-MIR172a     | 652.8032 | 39.50524 | 4063.14  | 1.393728      |
| Mac-MIR172b     | 652.8032 | 39.50524 | 4063.14  | 1.393728      |
| Mac-MIR172c     | 652.8032 | 39.50524 | 4063.14  | 1.393728      |
| Mac-MIR172d     | 652.8032 | 39.50524 | 4063.14  | 1.393728      |
| Mac-MIR172e     | 16.75047 | 23.56453 | 51.67827 | 0             |
| Mac-MIR172f     | 652.8032 | 39.50524 | 4063.14  | 1.393728      |
| Mac-MIR172g     | 1.395873 | 1.039612 | 3.735778 | 0.314474      |
| Mac-MIR172h     | 16.75047 | 23.56453 | 51.67827 | 0             |
| Mac-MIR172i     | 652.8032 | 39.50524 | 4063.14  | 1.393728      |
| Mac-MIR172j     | 652.8032 | 39.50524 | 4063.14  | 1.393728      |
| Mac-MIR172k     | 652.8032 | 39.50524 | 4063.14  | 1.393728      |
| Mac-MIR172l     | 652.8032 | 39.50524 | 4063.14  | 1.393728      |
| Mac-MIR172m     | 652.8032 | 39.50524 | 4063.14  | 1.393728      |
| Mac-MIR172n     | 654.6643 | 39.85178 | 4079.329 | 1.498552      |
| Mac-MIR172o     | 652.8032 | 39.50524 | 4063.14  | 1.393728      |
| Mac-MIR172p     | 652.8032 | 39.50524 | 4063.14  | 1.393728      |
| Mac-MIR172q     | 652.8032 | 39.50524 | 4063.14  | 1.393728      |

Table S9 (cont.)

| mature_miRNA_ID | Flower      | Fruit       | Leaf       | Leaf and Root |
|-----------------|-------------|-------------|------------|---------------|
| Mac-MIR319a     | 3.257036    | 60.64401    | 30.89128   | 0.461008      |
| Mac-MIR319b     | 3.257036    | 60.64401    | 30.89128   | 0.461008      |
| Mac-MIR319c     | 3.257036    | 60.64401    | 30.89128   | 0.461008      |
| Mac-MIR319d     | 3.257036    | 60.64401    | 30.89128   | 0.461008      |
| Mac-MIR319e     | 3.257036    | 60.64401    | 30.89128   | 0.461008      |
| Mac-MIR319f     | 3.722327    | 60.29747    | 33.13219   | 0.461008      |
| Mac-MIR319g     | 0.930582    | 2.772298    | 9.461952   | 0.230504      |
| Mac-MIR319h     | 3.722327    | 60.29747    | 33.13219   | 0.461008      |
| Mac-MIR319i     | 3.722327    | 60.29747    | 33.13219   | 0.461008      |
| Mac-MIR319j     | 3.722327    | 60.29747    | 33.13219   | 0.461008      |
| Mac-MIR319k     | 3.722327    | 60.29747    | 33.13219   | 0.461008      |
| Mac-MIR390a     | 8.375237    | 8.316893    | 26.6638    | 0.251359      |
| Mac-MIR390b     | 8.375237    | 8.316893    | 26.6638    | 0.251359      |
| Mac-MIR390c     | 8.375237    | 8.316893    | 26.6638    | 0.251359      |
| Mac-MIR390d     | 8.375237    | 8.316893    | 26.6638    | 0.251359      |
| Mac-MIR390e     | 8.375237    | 8.316893    | 26.6638    | 0.251359      |
| Mac-MIR390f     | 8.375237    | 8.316893    | 26.6638    | 0.251359      |
| Mac-MIR399a     | 0.465291    | 0.346537    | 1.112068   | 0             |
| Mac-MIR399b     | 0           | 0.346537    | 2.09119    | 0             |
| Mac-MIR399c     | 0.930582    | 0.693074    | 4.35707    | 0.377038      |
| Mac-MIR399d     | 0           | 0.346537    | 2.09119    | 0             |
| Mac-miR171a     | 6.514072957 | 0.693074419 | 22.9536494 | 0.335328818   |
| Mac-miR171b     | 6.514072957 | 0.693074419 | 22.95365   | 0.335328818   |
| Mac-miR171c     | 3.722327404 | 0.34653721  | 65.43455   | 0.681360431   |
| Mac-miR171d     | 6.514072957 | 0.693074419 | 22.95365   | 0.335328818   |
| Mac-miR171e     | 6.514072957 | 0.693074419 | 22.95365   | 0.335328818   |
| Mac-miR171f     | 3.722327404 | 0.34653721  | 65.43455   | 0.681360431   |
| Mac-miR171g     | 3.722327404 | 0.34653721  | 65.43455   | 0.681360431   |
| Mac-miR171h     | 6.514072957 | 0.693074419 | 22.95365   | 0.335328818   |
| Mac-miR171i     | 2.326454627 | 1.386148838 | 2.124973   | 0.052412341   |
| Mac-miR171j     | 6.514072957 | 0.693074419 | 22.95365   | 0.335328818   |
| Mac-miR171k     | 0           | 0           | 9.311632   | 0             |
| Mac-miR171l     | 0           | 0           | 9.311632   | 0             |
