# Supplementary material for: Characterization of MicroRNAs and Gene Expression in ACC Oxidase RNA Interference-Based Transgenic Bananas
Source: MDPI journal article supplement (doi:10.3390/plants12193414), 2023-09-28
Supplement: s1 [file s1]

Table S5. Expression of miRNA-targeted genes in RNAi transgenic bananas.

| miRNA          | Target Gene | WT    | As1    | As2    | NR description                                              |
|----------------|-------------|-------|--------|--------|-------------------------------------------------------------|
| mac-miR172a    | c29474_g1   | 22.94 | 13.00  | 9.51   | SIR                                                         |
|                | c33334_g1   | 3.40  | 0.00   | 5.09   | floral homeotic protein APETALA 2-like                      |
| mac-miR156e-5p | c32330_g1   | 1.73  | 1.35   | 0.20   | SPL17                                                       |
|                | c71850_g1   | 0.00  | 3.31   | 0.00   | alkaline/neutral invertase CINV2-like                       |
| mac-miR164a-5p | c44026_g1   | 0.79  | 2.90   | 7.54   | NAC domain-containing protein 79                            |
|                | c24007_g1   | 0.00  | 2.35   | 0.25   | NAC domain-containing protein 21/22-like                    |
|                | c52017_g3   | 4.9   | 0.00   | 0.00   | NAC domain-containing protein 100-like                      |
| mac-miR169a    | c52656_g2   | 13.76 | 7.67   | 8.15   | putative Nuclear transcription factor Y subunit A-1         |
| mac-miR168b-3p | c41242_g1   | 41.21 | 3.18   | 15.00  | uncharacterized protein LOC103992069                        |
|                | c42571_g2   | 2.30  | 1.96   | 2.71   | cytoplasmic tRNA 2-thiolation protein 2                     |
|                | c44639_g1   | 0.07  | 3.74   | 3.13   | leucine-rich repeat receptor-like protein<br>FASCIATED EAR2 |
|                | c46744_g1   | 13.13 | 143.05 | 86.02  | uncharacterized protein LOC103984436                        |
| mac-miR171a    | c44147_g1   | 2.36  | 27.38  | 43.40  | putative Agamous-like MADS-box protein AGL29                |
|                | c52353_g1   | 56.92 | 12.76  | 18.18  | cycE                                                        |
| mac-miR319c-3p | c41200_g1   | 3.03  | 1.05   | 0.79   | putative Transcription factor GAMYB                         |
| mac-miR162     | c21676_g1   | 2.08  | 0.14   | 0.52   | uncharacterized protein LOC103976854                        |
| mac-miR166a    | c48982_g1   | 13.38 | 40.20  | 12.76  | homeobox-leucine zipper protein HOX9                        |
| mac-miR390b-5p | c46309_g1   | 11.95 | 16.84  | 15.59  | sorting nexin 2B-like                                       |
| mac-miR397     | c29475_g1   | 3.65  | 0.00   | 0.00   | laccase-22-like                                             |
|                | c39516_g1   | 0.00  | 0.09   | 6.85   | laccase-22-like                                             |
| mac-miR171b    | c44147_g1   | 2.36  | 27.38  | 43.40  | agamous-like MADS-box protein AGL62                         |
| mac-miR394-5p  | c30884_g1   | 78.57 | 29.47  | 5.00   | tubulin beta-7 chain                                        |
|                | c34590_g1   | 3.12  | 7.08   | 2.73   | F-box/kelch-repeat protein At1g23390-like                   |
|                | c39482_g1   | 1.16  | 2.38   | 1.31   | zinc finger protein NUTCRACKER-like                         |
|                | c48278_g2   | 80.03 | 88.08  | 23.88  | BURP domain-containing protein 3-like                       |
|                | c48800_g1   | 15.25 | 9.23   | 8.41   | peptide chain release factor 1, mitochondrial               |
| novel_85       | c42169_g2   | 9.00  | 12.23  | 8.88   | UDP-glucuronic acid decarboxylase 4                         |
|                | c39780_g1   | 7.49  | 1.28   | 1.24   | Exo-poly-alpha-D-galacturonosidase                          |
|                | c51322_g1   | 61.91 | 220.76 | 267.68 | Beta-amylase 1                                              |
|                | c48267_g2   | 32.63 | 41.07  | 9.38   | Endoglucanase 9                                             |
