# Supplementary material for: Characterization of MicroRNAs and Gene Expression in ACC Oxidase RNA Interference-Based Transgenic Bananas
Source: MDPI journal article supplement (doi:10.3390/plants12193414), 2023-09-28
Supplement: s1 [file s1]

Table S3. The statistical of unique small RNA in WT, *Mh-ACO1* (As1) and *Mh-ACO2* (As2) RNAi transgenic banana plants matching with various types of small RNAs.

| Types       | WT     |        | As1    |        | As2    |        |
|-------------|--------|--------|--------|--------|--------|--------|
|             | no.    | %      | no.    | %      | no.    | %      |
| known_miRNA | 126    | 0.03   | 159    | 0.04   | 121    | 0.03   |
| rRNA        | 19089  | 4.89   | 20744  | 4.87   | 21397  | 5.46   |
| tRNA        | 1      | 0.00   | 0      | 0.00   | 1      | 0.00   |
| snRNA       | 760    | 0.19   | 867    | 0.20   | 1011   | 0.26   |
| snoRNA      | 460    | 0.12   | 521    | 0.12   | 524    | 0.13   |
| repeat      | 832    | 0.21   | 834    | 0.20   | 549    | 0.14   |
| novel_miRNA | 505    | 0.13   | 475    | 0.11   | 334    | 0.09   |
| ta-siRNA    | 221    | 0.06   | 246    | 0.06   | 129    | 0.03   |
| other       | 368647 | 94.37  | 401702 | 94.40  | 368022 | 93.86  |
| total       | 390641 | 100.00 | 425548 | 100.00 | 392088 | 100.00 |
