# Supplementary material for: Characterization of MicroRNAs and Gene Expression in ACC Oxidase RNA Interference-Based Transgenic Bananas
Source: MDPI journal article supplement (doi:10.3390/plants12193414), 2023-09-28
Supplement: s1 [file s1]

Table S8. Relative abundance of pri-miRNAs based on qRT-PCR data analysis during banana fruit ripening

| Pri-miRNA      | Ripening stage | Relative expression |
|----------------|----------------|---------------------|
| Pri-miR169a    | 1              | 1.000±0.134228      |
|                | 3              | 1.740403±0.1055411  |
|                | 5              | 1.61055±0.1336337   |
|                | 7              | 3.025719±0.1277512  |
| Pri-miR319c-3p | 1              | 0.9999998±0.117999  |
|                | 3              | 2.596222±0.417377   |
|                | 5              | 3.576351±0.300469   |
|                | 7              | 4.088816±0.273541   |
