# Supplementary material for: Characterization of MicroRNAs and Gene Expression in ACC Oxidase RNA Interference-Based Transgenic Bananas
Source: MDPI journal article supplement (doi:10.3390/plants12193414), 2023-09-28
Supplement: s1 [file s1]

Table S7. Nucleotide sequences of primers used qRT-PCR for detection of pri-miRNAs.

| Primer name              | Primer sequences (5'→3')                         |
|--------------------------|--------------------------------------------------|
| 5'adaptor Primer         | GTTTTCCCAGTCACGACACGTAACGGCATGACAGTGGGGGGGGGGGGG |
| 3RACE adaptor            | GTTTTCCCAGTCACGACACGTAACGGCATGACAGTGT            |
| RACEOuter                | GTTTTCCCAGTCACGACACGTAAC                         |
| 3RACEInner               | GACACGTAACGGCATGACAGTG                           |
| 169-5race5race invertase | CAGCTACTTACCGAATCCATG                            |
| 169-5raceR1              | AGCCGGAATCATGCGGAAGCCTCACATG                     |
| 169-5raceR2              | AAGACACCGGCAAGTCATCCTTGGCTGC                     |
| 169-3raceF1              | ATGCAGCCAAGGATGACTTGCCGGTGTC                     |
| 169-3raceF2              | ACGCTATCAACTCGCAGTGTCGCATGG                      |
| 319-5race invertase      | CTCGGAAGAGCATGGTCAAC                             |
| 319-5raceR1              | GGAGAACACATCCTTTGCACGGGGGTGG                     |
| 319-5raceR2              | GCCGGGCATGTGGATGAATGAGTCGGCA                     |
| 319-3raceF1              | GAGCTTCCTTCAGTCCACTCATGGGTGG                     |
| 319-3raceF2              | GCCGACTCATTATCCACATGCCCGGCA                      |
