# Supplementary material for: Characterization of MicroRNAs and Gene Expression in ACC Oxidase RNA Interference-Based Transgenic Bananas
Source: MDPI journal article supplement (doi:10.3390/plants12193414), 2023-09-28
Supplement: s1 [file s1]

Table S2. Statistics of common and unique sequences in WT, *Mh-ACO1* (As1) and *Mh-ACO2* (As2) RNAi transgenic banana plants.

| Sample         | Unique sRNAs | Percentage | Total sRNAs | Percentage |
|----------------|--------------|------------|-------------|------------|
| WT             | 1,356,305    | 36.97%     | 4,088,721   | 34.78%     |
| As1            | 1,152,324    | 31.41%     | 4,301,614   | 36.59%     |
| As2            | 1,160,214    | 31.62%     | 3,366,260   | 28.63%     |
| WT&As1         | 172,439      | 7.38%      | 5,906,549   | 70.40%     |
| As1-specific   | 979,885      | 41.94      | 1,130,828   | 13.48%     |
| WT-specific    | 1,183,866    | 50.68%     | 1,352,958   | 16.13%     |
| WT&As2         | 152,723      | 6.46%      | 4,818,817   | 64.64%     |
| As2-specific   | 1,007,491    | 42.62%     | 1,253,095   | 16.81%     |
| WT-specific    | 1,203,582    | 50.92%     | 1,383,069   | 18.55%     |
| As1&As2        | 160,394      | 7.45%      | 5,304,154   | 69.17%     |
| As1-specific   | 991,930      | 46.09%     | 1,132,664   | 14.77%     |
| As2-specific   | 999,820      | 46.46%     | 1,231,056   | 16.05%     |
| As1 U As2 U WT | 3,323,965    | 100.00%    |             |            |
| As1 &As2 & WT  | 140,678      | 4.23%      |             |            |
| As1- specific  | 960,169      | 28.89%     |             |            |
| As2- specific  | 987,775      | 29.72%     |             |            |
| WT- specific   | 1,171,821    | 35.25%     |             |            |
