# Supplementary material for: Characterization of MicroRNAs and Gene Expression in ACC Oxidase RNA Interference-Based Transgenic Bananas
Source: MDPI journal article supplement (doi:10.3390/plants12193414), 2023-09-28
Supplement: s1 [file s1]

Table S6. Relative abundance of related miRNAs and their target genes based on qRT-PCR data analysis under hormone treatment.

| Gene name  | Ripening stage | CON                   | Ethylene             | 1-MCP                |
|------------|----------------|-----------------------|----------------------|----------------------|
| miR156e-5p | 1              | 0.9999999±0.231184    | 0.9905604±0.176831   | 0.8428439±0.07994946 |
|            | 3              | 0.7869563±0.1307947   | 0.5196584±0.07412175 | 0.9730312±0.1612713  |
|            | 5              | 0.509716±0.1023105    | 0.4163609±0.1125588  | 0.8035975±0.03187547 |
|            | 7              | 0.2888147±0.09189472  | 0.3293833±0.04726039 | 0.3952406±0.03137211 |
| miR164a-5p | 1              | 1±0.08739998          | 1.07627±0.135255     | 1.020322±0.193167    |
|            | 3              | 0.7684343±0.09550255  | 0.5695545±0.05357159 | 0.9254171±0.2814901  |
|            | 5              | 0.5719554±0.08269076  | 0.4845915±0.09886383 | 0.9254171±0.04164499 |
|            | 7              | 0.2848911±0.09117351  | 0.3987537±0.08343399 | 0.6567959±0.115017   |
| miR169a    | 1              | 0.9999999±0.04475325  | 0.7768515±0.07397803 | 0.8508651±0.1435644  |
|            | 3              | 0.6285105±0.04099707  | 0.5096691±0.05285799 | 0.745111±0.1126414   |
|            | 5              | 0.3609061±0.04606939  | 0.3025351±0.04303856 | 0.729654±0.1230125   |
|            | 7              | 0.08166129±0.01888612 | 0.1214609±0.01919406 | 0.5758334±0.07168743 |
| miR171a    | 1              | 0.9999999±0.2410049   | 0.871148±0.1620488   | 0.9058298±0.06689071 |
|            | 3              | 0.8254373±0.169655    | 0.4397493±0.02951873 | 0.8392494±0.06740341 |
|            | 5              | 1.058162±0.3142746    | 0.5412126±0.09614668 | 0.8209224±0.09363046 |
|            | 7              | 0.4451036±0.0412968   | 0.5596281±0.03752429 | 0.6018702±0.04717654 |
| miR319a    | 1              | 1±0.146107            | 0.9123567±0.06621674 | 1.006989±0.03017835  |
|            | 3              | 1.12404±0.2634942     | 0.5777582±0.04116603 | 1.155121±0.1138454   |
|            | 5              | 0.9351863±0.2503944   | 0.7703611±0.1296697  | 0.8937243±0.1268178  |
|            | 7              | 0.5306573±0.04720258  | 0.316552±0.01784366  | 0.4288501±0.06659437 |
| SPL17      | 1              | 1±0.2252764           | 1.07155±0.2162052    | 1.134669±0.3142523   |
|            | 3              | 2.311682±0.5209848    | 3.990681±0.7992577   | 4.754861±0.6763011   |
|            | 5              | 1.925321±0.2003287    | 12.64841±0.8615631   | 4.095992±0.5560142   |
|            | 7              | 9.86064±1.94484       | 163.501±8.858391     | 9.496761±1.267264    |
| NAC79      | 1              | 1±0.2508764           | 1.147418±0.3471828   | 1.051698±0.4207808   |
|            | 3              | 1.970744±0.1299981    | 2.799208±0.6332215   | 2.253409±0.3147966   |
|            | 5              | 1.365222±0.06395751   | 4.865106±0.7409787   | 2.955648±0.5653102   |
|            | 7              | 6.747022±0.8047503    | 154.5816±11.66036    | 7.432178±0.8329742   |
| NYA1       | 1              | 1±0.3055323           | 1.283211±0.3972303   | 0.8363353±0.303381   |
|            | 3              | 2.029987±0.2046173    | 3.698874±0.813805    | 5.328921±0.6704891   |
|            | 5              | 1.196399±0.1114529    | 5.016406±1.038418    | 9.154362±0.7446067   |
|            | 7              | 3.169845±0.4944974    | 55.95711±11.92657    | 12.72574±1.370186    |
| AGL29      | 1              | 1±0.3125947           | 1.032785±0.176102    | 1.245582±0.307687    |
|            | 3              | 1.768646±0.2106106    | 23.77768±1.674184    | 3.014783±0.2206557   |
|            | 5              | 2.897509±0.8667189    | 31.12359±0.4484213   | 3.741688±0.4914555   |
|            | 7              | 2.704027±0.4603983    | 267.5995±56.11243    | 11.05473±1.052026    |
| GAMYB      | 1              | 0.9999999±0.2193118   | 1.153303±0.2860011   | 1.35658±0.5192871    |
|            | 3              | 2.311048±0.2284263    | 3.667512±0.5216252   | 4.57862±0.177711     |
|            | 5              | 1.78818±0.2986197     | 10.25722±1.720167    | 5.325398±0.7499726   |
|            | 7              | 13.19274±0.5731872    | 42.17392±6.552601    | 13.94018±0.7492861   |
