# Supplementary material for: Characterization of MicroRNAs and Gene Expression in ACC Oxidase RNA Interference-Based Transgenic Bananas
Source: MDPI journal article supplement (doi:10.3390/plants12193414), 2023-09-28
Supplement: s1 [file s1]

Table S10. Primer design for detection of miRNA target genes during banana fruit ripening.

| Gene Name    | Primer  | Primer Sequence(5'-3') | Size of PCR product (bp) |
|--------------|---------|------------------------|--------------------------|
| <i>NAC79</i> | Forward | TCGATCGGGTTACTGGAAAG   | 129                      |
|              | Reverse | ACCCAATCGGTTTTCTACC    |                          |
| <i>AGL29</i> | Forward | CCGACCAGCTCCTACAACAG   | 100                      |
|              | Reverse | ATGTCGCCTTCGTTCTTGAC   |                          |
| <i>GAMYB</i> | Forward | GCCATTCCACACCAACTCTT   | 145                      |
|              | Reverse | GAGCCGCTTAGTACCTGTGC   |                          |
| <i>SPL17</i> | Forward | AGCCAACAACCCATTCAGTC   | 128                      |
|              | Reverse | GTTGGTTGTCCCTCCTGCTA   |                          |
| <i>NYA1</i>  | Forward | GAGACGCAGAGTGCAGACAG   | 116                      |
|              | Reverse | AGTTCCAGCTGGGTATGTGG   |                          |
| <i>Actin</i> | Forward | TTAATCCCAAAGCGAACAGG   | 93                       |
|              | Reverse | AGAGGACAGCCTGGATAGCA   |                          |
