# Supplementary material for: Characterization of MicroRNAs and Gene Expression in ACC Oxidase RNA Interference-Based Transgenic Bananas
Source: MDPI journal article supplement (doi:10.3390/plants12193414), 2023-09-28
Supplement: s1 [file s1]

Table S4. Differential expression of miRNAs among WT, As1 and As2.

| miR-name       | WT       | As1      | As2      |
|----------------|----------|----------|----------|
| mac-miR156e-5p | 5.646878 | 3.740079 | 81.47038 |
| mac-miR159     | 412916.7 | 540531.2 | 284608.6 |
| mac-miR162     | 12519.13 | 3149.147 | 12155.38 |
| mac-miR164a-5p | 265.4033 | 437.5893 | 195.5289 |
| mac-miR166a    | 22977.15 | 21643.84 | 10591.15 |
| mac-miR168b-3p | 11.29376 | 0.000001 | 0.000001 |
| mac-miR169a    | 5.646878 | 0.000001 | 0.000001 |
| mac-miR171a    | 5.646878 | 0.000001 | 0.000001 |
| mac-miR171b    | 11.29376 | 11.22024 | 0.000001 |
| mac-miR172a    | 50.8219  | 123.4226 | 130.3526 |
| mac-miR319b    | 172314.5 | 228956.4 | 300218.3 |
| mac-miR319c-3p | 11169.52 | 12170.22 | 25549.11 |
| mac-miR390b-5p | 0.000001 | 7.480159 | 48.88223 |
| mac-miR394-5p  | 56.46878 | 3.740079 | 65.1763  |
| mac-miR397     | 16.94063 | 0.000001 | 0.000001 |
| mac-miR399     | 16.94063 | 0.000001 | 16.29408 |
| novel_2        | 39.52815 | 71.06151 | 48.88223 |
| novel_3        | 70648.09 | 17529.75 | 71954.64 |
| novel_30       | 1072.907 | 729.3155 | 521.4104 |
| novel_35       | 6234.153 | 6429.197 | 3584.697 |
| novel_42       | 3184.839 | 852.7381 | 668.0571 |
| novel_51       | 1886.057 | 362.7877 | 2069.348 |
| novel_52       | 903.5005 | 1877.52  | 1466.467 |
| novel_53       | 175.0532 | 302.9464 | 276.9993 |
| novel_56       | 479.9846 | 168.3036 | 244.4111 |
| novel_58       | 400.9283 | 145.8631 | 130.3526 |
| novel_60       | 124.2313 | 220.6647 | 260.7052 |
| novel_61       | 11.29376 | 0.000001 | 0.000001 |
| novel_62       | 50.8219  | 67.32143 | 32.58815 |
| novel_63       | 39.52815 | 7.480159 | 81.47038 |
| novel_65       | 22.58751 | 7.480159 | 130.3526 |
| novel_66       | 11.29376 | 41.14087 | 32.58815 |
| novel_67       | 5.646878 | 7.480159 | 16.29408 |
| novel_68       | 0.000001 | 7.480159 | 0.000001 |
| novel_72       | 11.29376 | 3.740079 | 0.000001 |
| novel_75       | 169.4063 | 134.6429 | 391.0578 |
| novel_77       | 0.000001 | 3.740079 | 32.58815 |
| novel_79       | 11.29376 | 3.740079 | 16.29408 |
| novel_81       | 22.58751 | 22.44048 | 130.3526 |
| novel_83       | 0.000001 | 14.96032 | 0.000001 |
| novel_85       | 0.000001 | 3.740079 | 16.29408 |
| novel_87       | 67.76254 | 18.7004  | 97.76445 |
| novel_88       | 5.646878 | 3.740079 | 0.000001 |
| novel_90       | 1197.138 | 157.0833 | 1026.527 |
